# Supplementary material for: Mapping Local Climate Zones and Their Applications in European Urban Environments: A Systematic Literature Review and Future Development Trends
Source: MDPI journal article supplement (doi:10.3390/ijgi10040260), 2021-04-12
Supplement: s1 [file s1]

Archive with 3 entries (3 files):
- Supplementary_Table S2_Lehnert et al..pdf
- Supplementary_Figure S1_Lehnert et al..pdf
- Supplementary_Table S1_Lehnert et al..pdf
