# Supplementary material for: Mapping Local Climate Zones and Their Applications in European Urban Environments: A Systematic Literature Review and Future Development Trends
Source: MDPI journal article supplement (doi:10.3390/ijgi10040260), 2021-04-12
Supplement: s1 [file s1]

Supplementary materials for Michal Lehnert, Stevan Savić, Dragan Milošević, Jelena Dunjić and Jan Geletič. Mapping Local Climate Zones and their applications in European urban environments: A systematic literature review and future development trends. ISPRS Int. J. Geo-Inf. 2021

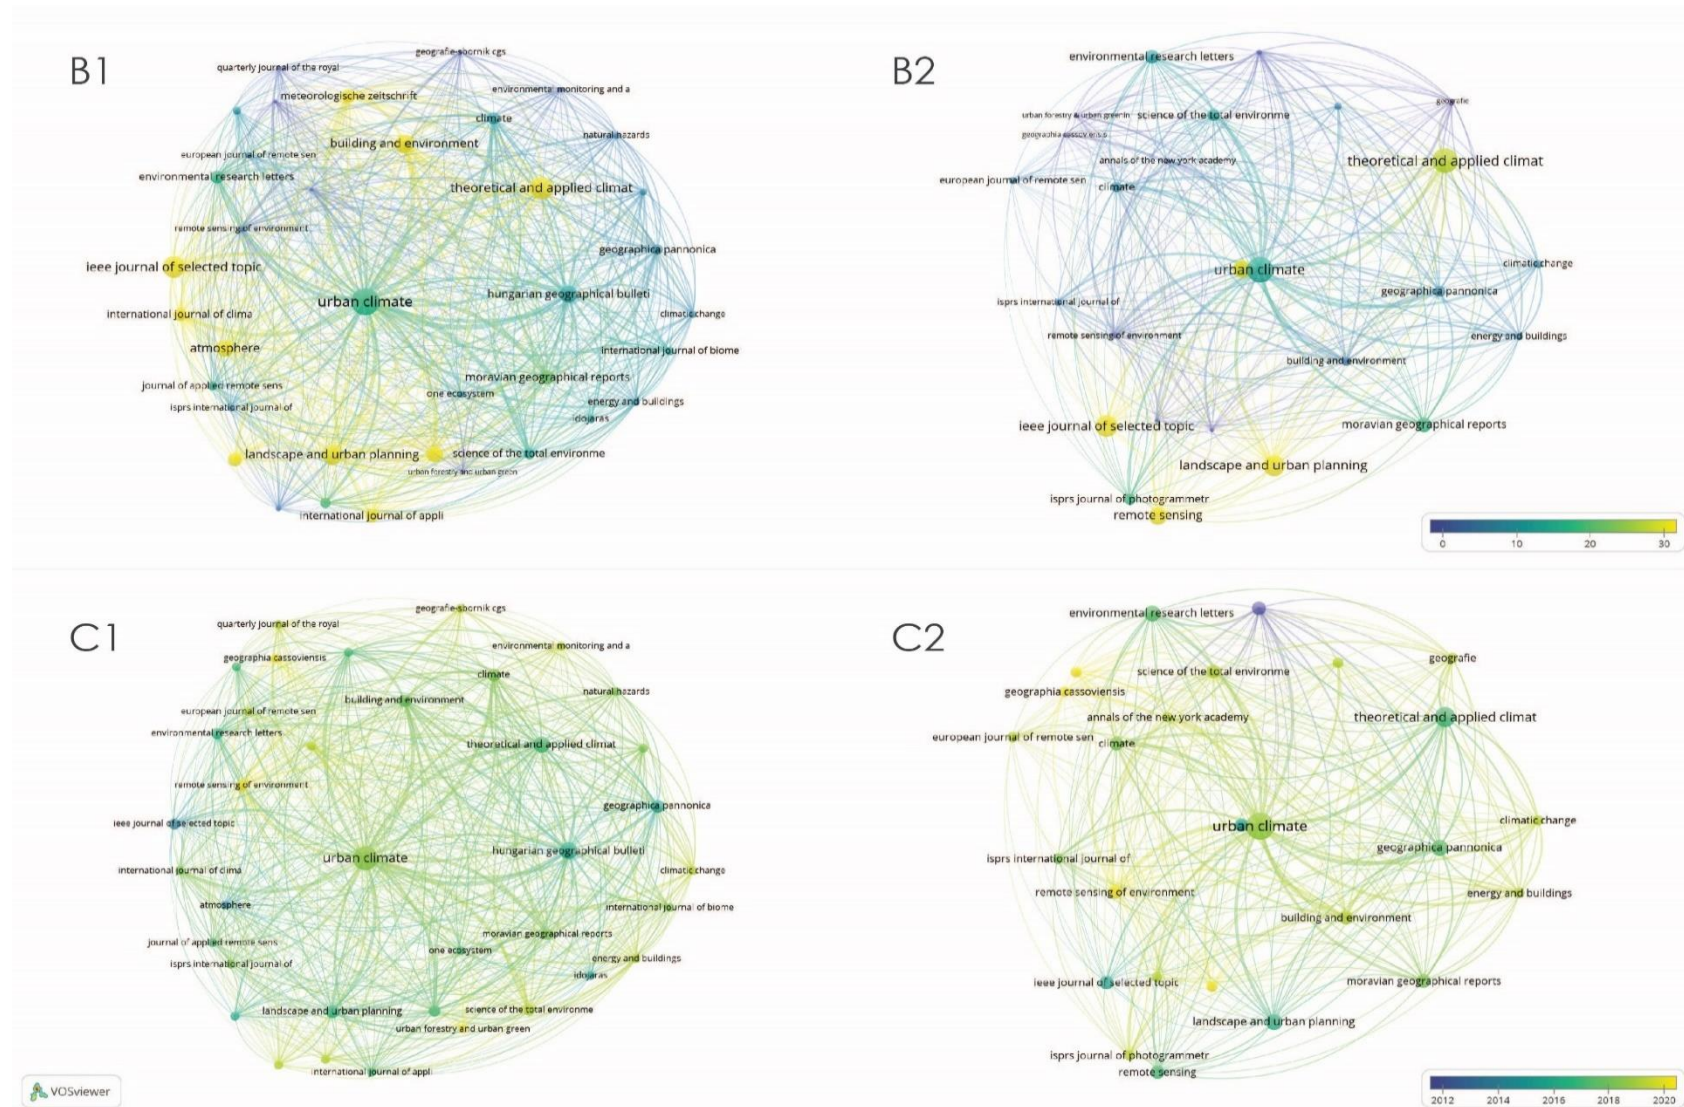

**Figure S1.** The most prolific sources of LCZ-related articles and the citation connections between them from Scopus (B1) and WoS (B2); and the most-cited sources of LCZ-related articles and citation connections in Scopus (C1) and WoS (C2).
