# Supplementary material for: Mapping Local Climate Zones and Their Applications in European Urban Environments: A Systematic Literature Review and Future Development Trends
Source: MDPI journal article supplement (doi:10.3390/ijgi10040260), 2021-04-12
Supplement: s1 [file s1 › Supplementary_Table S1_Lehnert et al..pdf]

**Table S1.** A brief presentation of temperature changes within LCZ patterns from studies identified in the review. Values/indices: T<sub>a</sub> – air temperature, LST – land surface temperature, UHI – urban heat island, SUHI – surface urban heat island, PET – physiological equivalent temperature, HUMIDEX – HUMAN Influence EXperiment, BBQ – barbeque days, WRF – weather research forecasting model.

| NIGHT-TIME                           |                                                                                          |                                                     |                                                                                                                      |                        |
|--------------------------------------|------------------------------------------------------------------------------------------|-----------------------------------------------------|----------------------------------------------------------------------------------------------------------------------|------------------------|
| Fixed ( <i>in-situ</i> ) measurement |                                                                                          |                                                     |                                                                                                                      |                        |
| City                                 | Sample reviewed                                                                          | Values/indices<br>(T <sub>a</sub> /LST/UHI/<br>PET) | LCZs in order of temperature                                                                                         | Source                 |
| Berlin Germany)                      | 5 stations: summer period 2001–2010                                                      | T <sub>a</sub>                                      | LCZ 5 > LCZ 6 > LCZ A > LCZ B                                                                                        | Fenner et al. 2014.    |
| Szeged (Hungary)                     | 24 stations, 2 nights: 29–31 March, 2014. 48h                                            | T <sub>a</sub>                                      | LCZ 2 > LCZ 3 > LCZ 5 > LCZ 8 > LCZ 6 > LCZ 9 ≈ LCZ D                                                                | Unger et al. 2014      |
| Dublin (Eire)                        | 6 stations, 3 nights: 30 August–1 September, 2010 (2100– 0600 hours)                     | T <sub>a</sub>                                      | LCZ 2 > LCZ 3 > LCZ 6 ≈ LCZ 5 > LCZ D                                                                                | Alexander & Mills 2014 |
| Olomouc (Czech Republic)             | 14 stations, 15 nights: 2010–2011 (8 hours after sunset)                                 | T <sub>a</sub>                                      | LCZ 2 > LCZ 5 > LCZ 4 > LCZ 6 ≈ LCZ 9 > LCZ D                                                                        | Lehnert et al. 2015    |
| Cluj Napoca (Romania)                | (8 fixed points, 3 nights: 13–14 May, 22–23 July and 24–25 October, 2015 (2300–0200))    | T <sub>a</sub>                                      | LCZ 1 ≈ LCZ 2 ≈ LCZ 3 ≈ LCZ B > LCZ 8G > LCZ 9                                                                       | Herbel et al 2016      |
| Szeged (Hungary)                     | 24 stations, June 2014: May 2015 (mean maximum night-time temperature differences)       | T <sub>a</sub>                                      | generally: LCZ 3 > LCZ 2 > LCZ 5 > LCZ 8 > LCZ 6 > LCZ 9; ideal days: LCZ 2 ≈ LCZ 3 ≈ LCZ 5 > LCZ 8 > LCZ 6 > LCZ 9  | Gal et al. 2016        |
| Novi Sad (Serbia)                    | 8 stations: 5-8 July 2014 (heat wave HW)                                                 | PET                                                 | LCZ 2 > LCZ 5 > LCZ 8 > LCZ 3 > LCZ 6 > LCZ 9 > LCZ D > LCZ A                                                        | Milošević et al. 2016  |
| Szeged (Hungary); Novi Sad (Serbia)  | 24 stations (Sz), 27 stations (NS): 3–5. July, 2014 and 19–20. July, 2014, 0000 UTC time | T <sub>a</sub>                                      | SZ: LCZ 2 > LCZ 3 > LCZ 8 > LCZ 5 > LCZ 6 > LCZ 9 > LCZ D; NS: LCZ 2 > LCZ 6 > LCZ 5 > LCZ 3 > LCZ 8 > LCZ A ≈ LCZ D | Lelovics et al. 2016.  |
| Szeged (Hungary)                     | 20 stations: June–August, 2014;                                                          | T <sub>a</sub>                                      | LCZ 3 > LCZ 2 > LCZ 5 > LCZ 8 > LCZ 6 > LCZ 9 > LCZ D                                                                | Skarbit et al. 2017    |
| Novi Sad (Serbia)                    | 9 stations: 17–25 July and 4–15 August, 2015 HW (2100-0500)                              | UHI index                                           | LCZ 2 ≈ LCZ 5 > LCZ 3 ≈ LCZ 6 > LCZ 9                                                                                | Savic et al. 2018      |
| Szeged (Hungary)                     | 2014 and 2017, two 5-day periods: normal (N) and heat wave (HW), UCMN data               | PET/ΔT                                              | LCZ 2 > LCZ 6 ≈ LCZ 8 > LCZ 9                                                                                        | Unger et al. 2020      |
| Mobile measurements                  |                                                                                          |                                                     |                                                                                                                      |                        |
| City                                 | Sample reviewed                                                                          | Values/indices<br>(T <sub>a</sub> /LST/UHI/<br>PET) | LCZs in order of temperature                                                                                         | Source                 |
| Dublin (Eire)                        | 6 stations, 3 nights: 30 August–1 September, 2010 (0100– 0200)                           | T <sub>a</sub>                                      | LCZ 2 > LCZ 3 > LCZ 8 > LCZ 6 ≈ LCZ 5 > LCZ D                                                                        | Alexander & Mills 2014 |
| Szeged (Hungary)                     | 4 nights: 2002–2003 (reference time four hours after sunset)                             | T <sub>a</sub>                                      | LCZ 2 > LCZ 3 > LCZ 8 > LCZ 5 > LCZ 6 > LCZ 9 > LCZ D                                                                | Lelovics et al. 2014   |
| Nancy (France)                       | July–September, 2012 and 2013 (0000– 0230)                                               | T <sub>a</sub>                                      | LCZ 2 > LCZ 5 > LCZ 8 > LCZ 6/9 > LCZ D                                                                              | Leconte et al. 2015    |

| Nancy (France)                      | 9 July and 15 August, 2013 (3h after sunset); 5 and 6 September 2013 7h after sunset)                                                                                     | T <sub>a</sub>                               | LCZ 2 > LCZ 5 > LCZ 8 > LCZ 6/9 > LCZ 8 > LCZ D                                                                                                                                                                                                        | Leconte et al. 2017  |
|-------------------------------------|---------------------------------------------------------------------------------------------------------------------------------------------------------------------------|----------------------------------------------|--------------------------------------------------------------------------------------------------------------------------------------------------------------------------------------------------------------------------------------------------------|----------------------|
| Brno; Olomouc (Czech Republic)      | Brno: 4 nights in July–September, 2011 (0–5 h after sunset); Olomouc: 5 nights in July–September, 2016 (2–5 h after sunset)                                               | T <sub>a</sub>                               | Brno: LCZ 2 > LCZ 5 > LCZ 8 > LCZ 6 > LCZ 9 > LCZ A ≈ LCZ D; Olomouc: LCZ 2 > LCZ 5 > LCZ 8 ≈ LCZ 6 ≈ LCZ 9 > LCZ B > LCZ D                                                                                                                            | Lehnert et al. 2018a |
| Olomouc (Czech Republic)            | 16 days: July 2016–February, 2017 (noon and two hours after sunset)                                                                                                       | T <sub>a</sub>                               | 2h after sunset: LCZ 2 > LCZ 5 > LCZ 6 > LCZ 8 > LCZ B > LCZ E > LCZ D > LCZ 9                                                                                                                                                                         | Lehnert et al. 2018b |
| <b>Modelling outcomes</b>           |                                                                                                                                                                           |                                              |                                                                                                                                                                                                                                                        |                      |
| City                                | Sample reviewed                                                                                                                                                           | Values/indices (T <sub>a</sub> /LST/UHI/PET) | LCZ in order of temperature                                                                                                                                                                                                                            | Source               |
| Oberhausen (Germany)                | 8 stations: August 2010–July, 2011 (number of tropical nights, warm nights); 10.07.2010 - PET                                                                             | tropical nights, warm nights; PET            | tropical nights, warm nights: LCZ 2 > LCZ 8 > LCZ 5 > LCZ 6 > LCZ 9 > LCZ A ≈ LCZ D; PET (night-time): LCZ A > LCZ 2 > LCZ 5 > LCZ 8 > LCZ 6 > LCZ d > LCZ 9                                                                                           | Muller et al. 2014   |
| Brno (Czech Republic)               | 14 stations: 4–14 August, 2015 (HW) (1000; 1600; 2200)                                                                                                                    | HUMIDEX                                      | 2200: LCZ 2 > LCZ 10 > LCZ 5 > LCZ 3 > LCZ 4 > LCZ 8 > LCZ 6 > LCZ E > LCZ C ≈ LCZ 9 ≈ LCZ B ≈ LCZ D > LCZ G > LCZ A                                                                                                                                   | Geletič et al. 2018  |
| Antwerp; Brussels; Ghent (Belgium)  | Summers 2014 & 2015 (0100): Antwerp 82 nights, Brussels 101 nights, Ghent 76 nights                                                                                       | T <sub>a</sub>                               | Antwerp: LCZ 2 > LCZ 3 > LCZ 8 ≈ LCZ E > LCZ 10 > LCZ 6 > LCZ G > LCZ A > LCZ B > LCZ 9 > LCZ D; Brussels: LCZ 2 > LCZ 3 > LCZ 8 > LCZ 6 > LCZ A > LCZ 9 ≈ LCZ B > LCZ D; Ghent: LCZ 3 > LCZ 2 > LCZ 8 > LCZ 6 ≈ LCZ G > LCZ A > LCZ 9 > LCZ B > LCZ D | Verdonck et al. 2018 |
| 42 cities in France                 | Statistical analysis of the night-time UHI for 42 cities selected according to LWT, based on the results of a six-summer-day simulation with mesoscale atm. model Meso-NH | UHII                                         | LCZ 3 > LCZ 2 > LCZ 1 > LCZ 5 > LCZ 6 > LCZ 4 > LCZ E > LCZ 8 > LCZ 9 > LCZ 7 > LCZ D > LCZ G                                                                                                                                                          | Gardes et al. 2020   |
| <b>Remote sensing</b>               |                                                                                                                                                                           |                                              |                                                                                                                                                                                                                                                        |                      |
| City                                | Sample reviewed                                                                                                                                                           | Values/indices (T <sub>a</sub> /LST/UHI/PET) | LCZs in order of temperature                                                                                                                                                                                                                           | Source               |
| Szeged (Hungary)                    | 12 and 14 August, 2008, between 1815 and 1945 UTC: aeroplane-borne, self-developed low-cost, small-format digital imaging system                                          | LST                                          | LCZ 2 > LCZ 3 > LCZ 5 ≈ 8 > LCZ 6 > LCZ 9 > LCZ A/B/C/D/G                                                                                                                                                                                              | Skarbit et al. 2015  |
| Lisbon (Portugal)                   | HW day Landsat Scene 06 July, 2013                                                                                                                                        | mean LST (K)                                 | LCZ D ≈ LCZ E ≈ LCZ 6 ≈ LCZ 3 = LCZ 8 ≈ LCZ C ≈ LCZ F ≈ LCZ 5 > LCZ 2 = LCZ 4 > LCZ 1 = LCZ 10 ≈ LCZ 9 ≈ LCZ B > LCZ A > LCZ G                                                                                                                         | Oliveira et al. 2020 |
| Szeged (Hungary); Novi Sad (Serbia) | MODIS, 01 June, 2014–31 May, 2018                                                                                                                                         | ΔLST                                         | (SZ) winter: LCZ 5 ≈ LCZ 3 ≈ LCZ 2 > LCZ 6 > LCZ 9 > LCZ 8; summer: LCZ 2 > LCZ 3 > LCZ 6 > LCZ 5 > LCZ 9 ≈ LCZ 8; (NS) winter: LCZ 2 > LCZ 5 > LCZ 3 > LCZ 6 ≈ LCZ 8 > LCZ 9; summer: LCZ 2 > LCZ 5 ≈ LCZ 3 > LCZ 8 > LCZ 6 > LCZ 9                   | Fricke et al. 2020   |
| Budapest (Hungary)                  | January 2001–October, 2016: MODIS data                                                                                                                                    | SUHII                                        | summer: LCZ 2 > LCZ 5 > LCZ G > LCZ 6 ≈ LCZ 8 > LCZ A > LCZ D; winter: LCZ 2                                                                                                                                                                           | Dian et al. 2020     |

> LCZ 5 > LCZ G > LCZ 6 > LCZ A ≈ LCZ 8 > LCZ D

#### DAYTIME

##### Fixed (*in-situ*) measurement

| City                  | Sample reviewed                                            | Values/indices<br>(T <sub>a</sub> /LST/UHI/<br>PET) | LCZs in order of temperature                                                  | Source                |
|-----------------------|------------------------------------------------------------|-----------------------------------------------------|-------------------------------------------------------------------------------|-----------------------|
| Hamburg<br>(Germany)  | 1 September, 2011–31 August 2012,<br>0800–2000 CET         | T <sub>a</sub>                                      | LCZ 2 > LCZ 6 > LCZ D                                                         | Wiesner et al. 2014   |
| Novi Sad<br>(Serbia)  | 8 stations: 5–8 July, 2014 (HW)                            | PET                                                 | LCZ D > LCZ 5 > LCZ 3 > LCZ 6 > LCZ 8<br>> LCZ 9 > LCZ 2 ≈ LCZ A              | Milošević et al. 2016 |
| Berlin (Ger-<br>many) | CWS (Netatmo) and 10 reference<br>sites, 2015              | T <sub>a</sub>                                      | mean annual: LCZ 2 > LCZ 4 = LCZ 5 ><br>LCZ 6 > LCZ A > LCZ D > LCZ 9 > LCZ B | Fener et al. 2017     |
| Augsburg<br>(Germany) | 38 stations: 15 December, 2014–<br>05 October, 2017        | T <sub>a</sub>                                      | LCZ 2 > LCZ 5 > LCZ 8 > LCZ 6 > LCZ D<br>> LCZ B > LCZ A                      | Beck et al. 2018      |
| Szeged<br>(Hungary)   | 24 stations: (32 months, 1 June 2014<br>- 31 January 2017) | PET                                                 | LCZ 2 > LCZ 3 > LCZ 5 > LCZ 6 > LCZ 9 ><br>LCZ D                              | Unger et al. 2018     |

##### Mobile measurements

| City                  | Sample reviewed                                                 | Values/indices<br>(T <sub>a</sub> /LST/UHI/<br>PET) | LCZs in order of temperature                             | Source                  |
|-----------------------|-----------------------------------------------------------------|-----------------------------------------------------|----------------------------------------------------------|-------------------------|
| Szeged<br>(Hungary)   | 4 nights, 2002–2003 (reference time<br>four hours after sunset) | T <sub>a</sub>                                      | LCZ 2 > LCZ 3 > LCZ 8 > LCZ 5 > LCZ 6 ><br>LCZ 9 > LCZ D | Lelovics et al. 2014    |
| Nancy<br>(France)     | July–September 2012 and 2013<br>(1400–1630)                     | T <sub>a</sub>                                      | LCZ 2 > LCZ 8 > LCZ 5 > LCZ 6/9 > LCZ<br>D               | Leconte et al. 2015     |
| Augsburg<br>(Germany) | 22 measurement campaigns: June–<br>August, 2017 (1200–1500)     | T <sub>a</sub>                                      | LCZ 5 > LCZ B > LCZ A                                    | Rathmann et al.<br>2020 |

##### Modelling outcomes

| City                     | Sample reviewed                                                                                                                                             | Values/indices<br>(T <sub>a</sub> /LST/UHI/<br>PET) | LCZs in order of temperature                                                                                                                                                                                                                                 | Source                  |
|--------------------------|-------------------------------------------------------------------------------------------------------------------------------------------------------------|-----------------------------------------------------|--------------------------------------------------------------------------------------------------------------------------------------------------------------------------------------------------------------------------------------------------------------|-------------------------|
| Oberhausen<br>(Germany)  | 8 stations: August 2010–July, 2011<br>(BBQ days); 10.07.2010 - PET                                                                                          | BBQ days &<br>PET                                   | BBQ: LCZ 2 > LCZ 8 > LCZ 5 > LCZ 6 ><br>LCZ 9 > LCZ A ≈ LCZ D; PET (daytime):<br>LCZ 2 > LCZ 5 ≈ LCZ 6 > LCZ D > LCZ 8<br>> LCZ 9 > LCZ A                                                                                                                    | Muller et al. 2014      |
| Brno (Czech<br>Republic) | 14 stations: 4–14 August, 2015<br>(HW) (1000; 1600; 2200)                                                                                                   | HUMIDEX                                             | 1000: LCZ 6 > LCZ 9 > LCZ 3 > LCZ 5 ≈<br>LCZ E ≈ LCZ D > LCZ C > LCZ 8 ≈ LCZ B<br>> LCZ 10 > LCZ A > LCZ 2 > LCZ 4 > LCZ<br>9; 1600: LCZ 3 > LCZ 5 > LCZ 10 ≈ LCZ 2<br>> LCZ 6 ≈ LCZ 8 > LCZ E > LCZ 4 ≈ LCZ 9<br>> LCZ B ≈ LCZ C ≈ LCZ D > LCZ G > LCZ<br>A | Geletič et al. 2018     |
| Brussels (Bel-<br>gium)  | UrbClim simulation of T <sub>a</sub> for the<br>near future (2031–2050, referred to<br>as 2040) and a far future period<br>(2081–2100, referred to as 2090) | T <sub>a</sub>                                      | LCZ 8 ≈ LCZ 1 ≈ LCZ 2 ≈ LCZ 3 > LCZ 5 ≈<br>LCZ 6 > LCZ 9 ≈ LCZ B ≈ LCZ A ≈ LCZ D                                                                                                                                                                             | Verdonck et al.<br>2019 |
| Szeged<br>(Hungary)      | 18 July (1200 UTC)–24 July (0000<br>UTC), 2017                                                                                                              | T <sub>a</sub> -WRF                                 | LCZ 5 > LCZ 2 > LCZ 9 > LCZ 6 > LCZ D                                                                                                                                                                                                                        | Molnar et al. 2019      |
| Oslo (Nor-<br>way)       | Open-access air temperature data<br>from 1452 privately-owned<br>weather (Netatmo) stations during<br>2018.                                                 | T <sub>a</sub>                                      | LCZ 2 > LCZ 3 > LCZ 8 > LCZ 5 > LCZ 4 ≈<br>LCZ 6 > LCZ 9 > LCZ E > LCZ B > LCZ D<br>> LCZ A                                                                                                                                                                  | Venter et al. 2020      |

##### Remote sensing

| City                                                   | Sample reviewed                                                                          | Values/indices<br>(T <sub>a</sub> /LST/UHI/<br>PET) | LCZs in order of temperature                                                                                                                                                                                                                                                                                                                                                                           | Source               |
|--------------------------------------------------------|------------------------------------------------------------------------------------------|-----------------------------------------------------|--------------------------------------------------------------------------------------------------------------------------------------------------------------------------------------------------------------------------------------------------------------------------------------------------------------------------------------------------------------------------------------------------------|----------------------|
| Szeged<br>(Hungary)                                    | May 2015; July 2015; Sep 2015; February 2016; (0930-1030)                                | LST                                                 | May 2015: LCZ 2 > LCZ 3 > LCZ 8 > LCZ 6 > LCZ 5 > LCZ 9; July 2015: LCZ 8 ≈ LCZ 2 > LCZ 3 > LCZ 6 > LCZ 5 > LCZ 9; Sept 2015: LCZ 8 ≈ LCZ 2 ≈ LCZ 3 > LCZ 6 > LCZ 5 > LCZ 9; Feb: LCZ 3 > LCZ 2 ≈ LCZ 8 > LCZ 6 ≈ LCZ 5 > LCZ 9                                                                                                                                                                        | Gemes et al. 2016    |
| Prague; Brno<br>(Czech Republic)                       | April 2002–June, 2015                                                                    | LST                                                 | LCZ 10 > LCZ 3 > LCZ 2 > LCZ 8 > LCZ B > LCZ C > LCZ G > LCZ A                                                                                                                                                                                                                                                                                                                                         | Geletič et al. 2016b |
| Brno; Prague<br>(Czech Republic); Novi Sad<br>(Serbia) | LANDSAT-8, 80 images: 19 – Brno, 32 – Prague and 29 – Novi Sad; spring 2013– summer 2018 | LST                                                 | Brno: LCZ 10 > LCZ 2 ≈ LCZ 3 > LCZ 8 > LCZ 5 > LCZ 4 ≈ LCZ 6 ≈ LCZ E > LCZ 9 > LCZ F > LCZ B ≈ LCZ D > LCZ C > LCZ G > LCZ A; Prague: LCZ 3 > LCZ 2 > LCZ 8 > LCZ 5 > LCZ 10 > LCZ 4 ≈ LCZ 6 ≈ LCZ E > LCZ F > LCZ 9 > LCZ B ≈ LCZ C > LCZ D > LCZ G ≈ LCZ A; Novi Sad: LCZ 10 ≈ LCZ 2 > LCZ 8 ≈ LCZ 3 > LCZ 5 ≈ LCZ E > LCZ 6 > LCZ 7 > LCZ 4 ≈ LCZ F > LCZ 9 > LCZ B ≈ LCZ D > LCZ C > LCZ A > LCZ G | Geletič et al. 2019a |
| Budapest<br>(Hungary)                                  | January 2001–October 2016: MODIS data                                                    | SUHII                                               | summer: LCZ 5 ≈ LCZ 2 > LCZ 8 > LCZ G ≈ LCZ 6 > LCZ D > LCZ A; winter: LCZ 2 > LCZ 5 ≈ LCZ G > LCZ 6 ≈ LCZ 8 > LCZ A > LCZ D                                                                                                                                                                                                                                                                           | Dian et al. 2020     |
| Szeged<br>(Hungary); Novi Sad<br>(Serbia)              | MODIS, 01 June 2014–31 May 2018                                                          | ΔLST                                                | (SZ) winter: LCZ 3 ≈ LCZ 5 ≈ LCZ 2 > LCZ 6 ≈ LCZ 8 ≈ LCZ 9; summer: LCZ 2 > LCZ 8 > LCZ 3 > LCZ 5 > LCZ 6 > LCZ 9; (NS) winter: LCZ 2 > LCZ 5 ≈ LCZ 3 > LCZ 8 > LCZ 9 > LCZ 6; summer: LCZ 2 > LCZ 8 > LCZ 3 > LCZ 5 > LCZ 6 > LCZ 9                                                                                                                                                                   | Fricke et al. 2020   |
| Olomouc<br>(Czech Republic)                            | 10 July, 2016, morning and afternoon aeroplane measurements (0500 and 1300)              | LST                                                 | Av. afternoon Ts: LCZ 2 > LCZ 5 > LCZ 8 ≈ LCZ 4 > LCZ 6 > LCZ A > LCZ G*; Av. morning Ts: LCZ 8 > LCZ G > LCZ 2 ≈ LCZ 4 > LCZ 5 ≈ LCZ 6 > LCZ A                                                                                                                                                                                                                                                        | Pour et al. 2020     |
