# Supplementary material for: Mapping Local Climate Zones and Their Applications in European Urban Environments: A Systematic Literature Review and Future Development Trends
Source: MDPI journal article supplement (doi:10.3390/ijgi10040260), 2021-04-12
Supplement: s1 [file s1 › Supplementary_Table S2_Lehnert et al..pdf]

**Table S2.** The list of 91 reviewed studies related to LCZs issues and with their content details.

| No. | Study                    | DOI/website of the study                                                                                                                                        | LCZs derivation method used | City/region analysed | LCZs classes detected    | Type of analysis                                                              |
|-----|--------------------------|-----------------------------------------------------------------------------------------------------------------------------------------------------------------|-----------------------------|----------------------|--------------------------|-------------------------------------------------------------------------------|
| 1.  | Savić et al. 2013        | <a href="http://www.dgt.uns.ac.rs/dokumentacija/pannonica/papers/volume17_3_1.pdf">http://www.dgt.uns.ac.rs/dokumentacija/pannonica/papers/volume17_3_1.pdf</a> | Expert knowledge-based      | Novi Sad (Serbia)    | 2,3,5,6,8,9,10,A,D       | Definition of LCZs classes for urban station sites                            |
| 2.  | Alexander and Mills 2014 | 10.3390/atmos5040755                                                                                                                                            | Combined method             | Dublin (Ireland)     | 2,3,5,6,8,9,A,D,G        | Modeling LCZs mapping using LULC approach and UHI assessment                  |
| 3.  | Fenner et al. 2014       | 10.1016/j.uclim.2014.02.004                                                                                                                                     | Combined method             | Berlin (Germany)     | 5,6,A,B                  | Spatial/temporal analysis of the Ta among different LCZs based on UMN dataset |
| 4.  | Lelovics et al. 2014     | 10.3354/cr01220                                                                                                                                                 | GIS-based                   | Szeged (Hungary)     | 2,3,5,6,8,9,10,A,B,C,D,G | Development of GIS-based method for LCZs classification in built areas        |
| 5.  | Müller et al. 2014       | 10.1007/s00704-013-0890-4                                                                                                                                       | Expert knowledge-based      | Oberhausen (Germany) | 2,5,6,8,9,A,D            | Thermal comfort assessment during extreme days based on LCZs differences      |
| 6.  | Stewart et al. 2014      | 10.1002/joc.3746                                                                                                                                                | Expert knowledge-based      | Uppsala (Sweden)     | 2,5,9,D                  | Definition of thermal differences among LCZs pattern                          |
| 7.  | Unger et al. 2014        | 10.15201/hungeobull.63.1.3                                                                                                                                      | GIS-based                   | Szeged (Hungary)     | 2,3,5,6,8,9,10,A,B,C,D,G | Development of GIS-based method for LCZs classification in built areas        |
| 8.  | Wiesner et al. 2014      | 10.1127/0941-2948/2014/0571                                                                                                                                     | Expert knowledge-based      | Hamburg (Germany)    | 2,6,D                    | Thermal and soil moisture assessments based on different urban morphology     |
| 9.  | Alexander et al. 2015    | 10.1016/j.uclim.2015.05.001                                                                                                                                     | Combined method             | Dublin (Ireland)     | 2,3,5,6,8,10,A,D,E,F,G   | Implementation of urban energy balance model (SUEWS) based on LCZs pattern    |
| 10. | Bechtel et al.           | 10.3390/ijgi4010199                                                                                                                                             | Remote sensing              | Hamburg              | All 17 LCZs              | Development of the                                                            |

|     |                             |                                                                                                                                                                                     |                        |                                   |                                                                                                                                         |                                                                                                                    |
|-----|-----------------------------|-------------------------------------------------------------------------------------------------------------------------------------------------------------------------------------|------------------------|-----------------------------------|-----------------------------------------------------------------------------------------------------------------------------------------|--------------------------------------------------------------------------------------------------------------------|
|     |                             | 2015                                                                                                                                                                                | imagery-based          | (Germany);<br>Dublin<br>(Ireland) |                                                                                                                                         | WUDAPT L0 method                                                                                                   |
| 11. | Emmanuel and Loconsole 2015 | 10.1016/j.landurbplan.2015.02.012                                                                                                                                                   | Combined method        | Glasgow (UK, Scotland)            | 2,5,6,9                                                                                                                                 | Assessment of green infrastructure performance (GAR) in mitigation of urban overheating by using LCZs concept      |
| 12. | Gál et al. 2015             | 10.15201/hungeoGbául, 1 IT.6. 5et.2 a.l2                                                                                                                                            | GIS-based              | Szeged (Hungary)                  | 2,3,5,6,8,9,10,A,B,C,D,G                                                                                                                | Analysis of spatial and temporal patterns of Ta and UHI between LCZs; measurements obtained from UMN stations      |
| 13. | Leconte et al. 2015         | 10.1016/j.buildenv.2014.05.005                                                                                                                                                      | Combined method        | Nancy (France)                    | 2,5,8,6/9,A,B,D,E,G                                                                                                                     | UHI assessment based on LCZs pattern and using mobile measurements                                                 |
| 14. | Lehnert et al. 2015         | 10.1007/s00704-014-1309-6                                                                                                                                                           | Expert knowledge-based | Olomouc (Czech Republic)          | 2 <sub>CC</sub> ,2 <sub>BOC</sub> ,4,4 <sub>2</sub> ,5,5 <sub>6</sub> ,6 <sub>65</sub> ,9 <sub>5</sub> ,B <sub>D</sub> ,B <sub>DW</sub> | Development the LCZs classification approach to determine urban surface of UMN stations                            |
| 15. | Šećerov et al. 2015         | <a href="http://scindeks-clanci.ceon.rs/data/pdf/0354-8724/2015/0354-87241504174S.pdf">http://scindeks-clanci.ceon.rs/data/pdf/0354-8724/2015/0354-87241504174S.pdf</a>             | GIS-based              | Novi Sad (Serbia)                 | 2,3,5,6,8,9,10,A,D,G                                                                                                                    | Defining UMN stations based on LCZs derived from GIS-based method                                                  |
| 16. | Skarbit et al. 2015         | 10.1109/JURSE.2015.7120497                                                                                                                                                          | GIS-based              | Szeged (Hungary)                  | 2,3,5,6,8,9,10,A,B,C,D,G                                                                                                                | Airborne surface temperature differences based on LCZs concept                                                     |
| 17. | Theeuwes et al. 2015        | 10.1088/1748-9326/10/11/114022                                                                                                                                                      | Expert knowledge-based | Basel (Switzerland)               | 1 – 10                                                                                                                                  | Determine the sensitivity of the UCI in different LCZs                                                             |
| 18. | Unger et al. 2015           | <a href="http://real.mtak.hu/28561/1/a90bf7513efb86263e8dc6f781f040fa-119-32-unger-0903.pdf">http://real.mtak.hu/28561/1/a90bf7513efb86263e8dc6f781f040fa-119-32-unger-0903.pdf</a> | GIS-based              | Szeged (Hungary)                  | 2,3,5,6,8,9,10,A,B,C,D,G                                                                                                                | Temporal and intra-urban pattern of air temperature and PET based on LCZs; measurements obtained from UMN stations |
| 19. | Alexander et al. 2016       | 10.1016/j.landurbplan.2016.02.006                                                                                                                                                   | Combined method        | Dublin (Ireland)                  | 2,3,5,6,8,A,D,F,G                                                                                                                       | Development of LCZs classification approach and heat index assessment                                              |
| 20. | Basset et al. 2016          | 10.1002/gj.2836                                                                                                                                                                     | Combined method        | Birmingham (UK)                   | 1,2,5,6,10,B                                                                                                                            | Correlation of urban fraction data with                                                                            |

|     |                          |                                                                                                                                                               |                              |                                                |                                   | UHI component                                                                                                           |
|-----|--------------------------|---------------------------------------------------------------------------------------------------------------------------------------------------------------|------------------------------|------------------------------------------------|-----------------------------------|-------------------------------------------------------------------------------------------------------------------------|
| 21. | Brousse et al. 2016      | 10.1016/j.uclim.2016.04.001                                                                                                                                   | Remote sensing imagery-based | Madrid (Spain)                                 | All 17 LCZs                       | Contribution of the LCZs scheme in urban climate models                                                                 |
| 22. | Danylo et al. 2016       | 10.1109/JSTARS.2016.2539977                                                                                                                                   | Remote sensing imagery-based | Kyiv; Lviv (Ukraine)                           | 2,4,5,6,8,9,A,B,C,D,E,F,G         | Testing the accuracy of the LCZs from the WUDAPT L0                                                                     |
| 23. | Geletič and Lehnert 2016 | 10.1515/mgr-2016-0012                                                                                                                                         | GIS-based                    | Brno; Olomouc; Hradec Králové (Czech Republic) | 1,2,3,4,5,6,8,9,10,A,B, C,D,E,F,G | Development of GIS-based method for LCZs classification in built areas                                                  |
| 24. | Geletič et al. 2016a     | 10.15201/hungeobull.65.2.7                                                                                                                                    | GIS-based                    | Brno (Czech Republic)                          | 1,2,3,4,5,6,8,9,10,A,B, C,D,E,F,G | Comparison (validation) of Ta from model MUKLIMO_3 with real temperature measurements from 5 stations in different LCZs |
| 25. | Geletič et al. 2016b     | 10.3390/rs8100788                                                                                                                                             | GIS-based                    | Prague; Brno (Czech Republic)                  | 2,3,4,5,6,8,9,10,A,B, C,D,E,F,G   | LST assessment obtained from Aster and Landsat datasets in different LCZs                                               |
| 26. | Gémes et al. 2016        | 10.1515/jengeo-2016-0004                                                                                                                                      | GIS-based                    | Szeged (Hungary)                               | 2,3,5,6,8,9,10,A,B,C,D,G          | Analysis of long term and seasonal development of urban LST and SUHI based on LCZs                                      |
| 27. | Herbel et al. 2016       | 10.15201/hungeobull.65.2.3                                                                                                                                    | Expert knowledge-based       | Cluj-Napoca (Romania)                          | 1,2,3,6,8,9,B                     | Assessment of the UHI sensitivity in different LCZs                                                                     |
| 28. | Lelovics et al. 2016     | <a href="https://www.met.hu/en/ismeret-tar/kiadvanyok/idojara-s/index.php?id=507">https://www.met.hu/en/ismeret-tar/kiadvanyok/idojara-s/index.php?id=507</a> | GIS-based                    | Szeged (Hungary); Novi Sad (Serbia)            | 2,3,5,6,8,9,10,A,B,C,D,G          | Intra-urban temperature observation based on LCZs concept and UMN datasets                                              |
| 29. | Milošević et al. 2016    | 10.15201/hungeobull.65.2.4                                                                                                                                    | GIS-based                    | Novi Sad (Serbia)                              | 2,3,5,6,8,9,10,A,D,G              | PET assessment based on different LCZs                                                                                  |
| 30. | Skarbit and Gál 2016     | 10.15201/hungeobull.65.2.8                                                                                                                                    | Remote sensing imagery-based | Szeged (Hungary)                               | 2,3,5,6,8,9,A,B,D,G               | Temperature analysis using MUKLIMO_3 microclimate model                                                                 |
| 31. | Wouters et al. 2016      | 10.5194/gmd-9-3027-2016                                                                                                                                       | Combined method              | Belgium cities                                 | All 17 LCZs                       | Modelling of UCPs and its impacts on LST pattern                                                                        |
| 32. | Arnds et al. 2017        | 10.1007/s00704-015-                                                                                                                                           | Combined meth-               | Hamburg                                        | 2,4,5,6,8,10,A,B,D                | Modeling the spatio-                                                                                                    |

|     |                       |                                 |                              |                                    |                                    |                                                                                                           |
|-----|-----------------------|---------------------------------|------------------------------|------------------------------------|------------------------------------|-----------------------------------------------------------------------------------------------------------|
|     |                       | 1687-4                          | od                           | (Germany)                          | ,E,G                               | temporal differences of UHI based on UMN data                                                             |
| 33. | Fenner et al. 2017    | 10.1127/metz/2017/0861          | Remote sensing imagery-based | Berlin (Germany)                   | 2,4,5,6,8,9,A,B,C,D,F,G            | Temperature analysis using CWS and LCZs spatial pattern                                                   |
| 34. | Leconte et al. 2017   | 10.1007/s00704-016-1886-7       | Combined method              | Nancy (France)                     | 2,5,8,6/9,D                        | Analysis of nocturnal Ta in LCZs using mobile measurements                                                |
| 35. | Nedkov et al. 2017    | 10.3897/oneeco.2.e14499         | Combined method              | Bulgarian cities                   | All 17 LCZs (except LCZ 1)         | Using LCZs concept in implementation of ecosystem classes by MAES typology                                |
| 36. | Skarbit et al. 2017   | 10.1002/joc.5023                | GIS-based                    | Szeged (Hungary)                   | 2,3,5,6,8,9,10,A,B,C,D,G           | Assessment of air temperature indices measured from UMN; spatiotemporal analysis is based on LCZs concept |
| 37. | Tornay et al. 2017    | 10.1016/j.uclim.2017.03.002     | Expert knowledge-based       | France cities                      | 1 – 10                             | Development of GENIUS typology                                                                            |
| 38. | Verdonck et al. 2017  | 10.1016/j.jag.2017.05.017       | Remote sensing imagery-based | Antwerp; Brussels; Ghent (Belgium) | 1,2,3,6,8,9,10,A,B,D,E,G           | Improvement the LCZs mapping AO from the WUDAPT L0                                                        |
| 39. | Wicki and Parlow 2017 | 10.1117/1.JRS.11.026001         | Combined method              | Basel (Switzerland)                | 2,3,5 <sub>E</sub> ,6,9,10,A,C,D,G | Implementation of LCZs classification approach using LULC scheme                                          |
| 40. | Beck et al. 2018      | 10.1016/j.uclim.2018.04.007     | Remote sensing imagery-based | Augsburg Germany)                  | 2,5,6,8,A,B,D,F,G                  | Air temperature differences based on LCZs pattern                                                         |
| 41. | Bocher et al. 2018    | 10.1016/j.uclim.2018.01.008     | GIS-based                    | France cities                      | 1,2,3,4,5,6,7,8,9,10               | Development of open geoprocessing framework to calculate LCZs classes                                     |
| 42. | Droste et al. 2018    | 10.1088/1748-9326/aad8ef        | Expert knowledge-based       | Basel (Switzerland)                | 1 – 10                             | Assessment of urban wind island effect                                                                    |
| 43. | Geletič et al. 2018   | 10.1016/j.scitotenv.2017.12.076 | GIS-based                    | Brno (Czech Republic)              | 1,2,3,4,5,6,8,9,10,A,B, C,D,E,F,G  | Modelling and analyzing spatiotemporal variability of OTC in LCZs of central European city                |

|     |                        |                          |                                        |                                                                                                                                        |                                    |                                                                                                                                        |
|-----|------------------------|--------------------------|----------------------------------------|----------------------------------------------------------------------------------------------------------------------------------------|------------------------------------|----------------------------------------------------------------------------------------------------------------------------------------|
| 44. | Goncalves et al. 2018  | 10.3390/cli6030070       | Combined method                        | Braganca (Portugal)                                                                                                                    | 2,3,5,8,9,A/B,C/D                  | Modeling of UHI and UCI patterns in different LCZs                                                                                     |
| 45. | Hammerberg et al. 2018 | 10.1002/joc.5447         | Remote sensing imagery-based/GIS-based | Vienna (Austria)                                                                                                                       | All 17 LCZs                        | Comparison of air temperature patterns using WUDAPT and GIS LCZs mapping                                                               |
| 46. | Hu et al. 2018         | 10.3390/ijgi7090379      | Remote sensing imagery-based           | Globally, including European cities                                                                                                    | All 17 LCZs                        | Implementing Sentinel-1 data for global LCZs mapping                                                                                   |
| 47. | Lehnert et al. 2018a   | 10.3354/cr01508          | GIS-based                              | Brno; Olomouc (Czech Republic)                                                                                                         | 1,2,3,4,5,6,8,9,10, A,B, C,D,E,F,G | Accessing the temperature differences among LCZs established by mobile measurements                                                    |
| 48. | Lehnert et al. 2018b   | 10.5937/gp22-19750       | GIS-based                              | Olomouc (Czech Republic)                                                                                                               | 1,2,3,4,5,6,8,9,10, A,B, C,D,E,F,G | Air temperature assessment in different LCZs and identify heat stress vulnerable spots; datasets are obtained from mobile measurements |
| 49. | Oxoli et al. 2018      | 10.3390/ijgi7110421      | Remote sensing imagery-based           | Milan (Italy)                                                                                                                          | 2,3,5,6,8,B,D,G                    | Air temperature pattern based on LCZs                                                                                                  |
| 50. | Quanz et al. 2018      | 10.3390/cli6010005       | Combined method                        | Berlin (Germany)                                                                                                                       | 2 <sub>B</sub>                     | Micro-scale variability of Ta in densely built-up LCZ                                                                                  |
| 51. | Qui et al. 2018        | 10.3390/rs10101572       | Remote sensing imagery-based           | Amsterdam (The Netherlands); Zurich (Switzerland); Rome; Milan (Italy); Paris (France); Munich; Cologne; Berlin (Germany); London (UK) | All 17 LCZs (except LCZ 7)         | Using CNN and multi-source data to improve the WUDAPT L0 approach                                                                      |
| 52. | Richard et al.         | 10.1016/j.uclim.2018.10. | Remote sensing                         | Dijon                                                                                                                                  | 2,3,4,5,6,7,8,9,10,                | Investigation of UHI                                                                                                                   |

|     |                       |                                                                                                           |                                        |                                                                                                   |                                                                                                                                         |                                                                                          |
|-----|-----------------------|-----------------------------------------------------------------------------------------------------------|----------------------------------------|---------------------------------------------------------------------------------------------------|-----------------------------------------------------------------------------------------------------------------------------------------|------------------------------------------------------------------------------------------|
|     | 2018                  | 002                                                                                                       | imagery-based                          | (France)                                                                                          | A,B,C,D,E,G                                                                                                                             | and climate modeling based on LCZs and UCZs                                              |
| 53. | Savić et al. 2018     | 10.1007/s11069-017-3160-4                                                                                 | GIS-based                              | Novi Sad (Serbia)                                                                                 | 2,3,5,6,8,9,10,A,D,G                                                                                                                    | Heat wave risk assessments for different built-up LCZs                                   |
| 54. | Unger et al. 2018     | 10.1007/s00484-017-1440-z                                                                                 | GIS-based                              | Szeged (Hungary)                                                                                  | 2,3,5,6,9,D                                                                                                                             | Intra-urban diurnal and seasonal investigation of PET index in LCZs in and around Szeged |
| 55. | Verdonck et al. 2018  | 10.1016/j.landurbplan.2018.06.004                                                                         | Remote sensing imagery-based           | Antwerp; Brussels; Ghent (Belgium)                                                                | 1,2,3,6,8,9,10,A,B,D,E,G                                                                                                                | Thermal behaviour analysis based on LCZs and using UrbClim model                         |
| 56. | Wicki et al. 2018     | 10.3390/cli6030055                                                                                        | Combined method                        | Basel (Switzerland)                                                                               | 2,2 <sub>3</sub> ,2 <sub>10</sub> ,2 <sub>A</sub> ,6,10 <sub>2</sub> ,A <sub>E</sub> ,D,D <sub>9</sub> ,E <sub>10</sub> ,G <sub>A</sub> | Modeling and evaluation of UHI intensity in different LCZs                               |
| 57. | Bechtel et al. 2019a  | 10.1016/j.uclim.2018.10.001                                                                               | Remote sensing imagery-based           | Globally, including European cities                                                               | All 17 LCZs                                                                                                                             | Development of the WUDAPT L0 method                                                      |
| 58. | Bechtel et al. 2019b  | 10.1016/j.uclim.2019.01.005                                                                               | Remote sensing imagery-based           | Globally, including European cities                                                               | All 17 LCZs                                                                                                                             | Investigating SUHI based on LCZs concept                                                 |
| 59. | Bokwa et al. 2019     | <a href="https://doi.org/10.1016/j.enbuild.2019.07.023">https://doi.org/10.1016/j.enbuild.2019.07.023</a> | Remote sensing imagery-based/GIS-based | Bratislava (Slovakia); Brno (Czech Republic); Kraków (Poland); Szeged (Hungary); Vienna (Austria) | All 17 LCZs                                                                                                                             | Thermal spatial distribution based on LCZs using MUK-LIMO_3 micro-climate model          |
| 60. | Demuzere et al. 2019a | 10.1371/journal.pone.0214474                                                                              | Remote sensing imagery-based           | European continent                                                                                | All 17 LCZs                                                                                                                             | Improvements of the WUDAPT L0 method using EE                                            |
| 61. | Demuzere et al. 2019b | 10.1016/j.uclim.2018.11.001                                                                               | Remote sensing imagery-based           | Globally, including European cities                                                               | All 17 LCZs                                                                                                                             | Improvements of the WUDAPT L0 method using EE                                            |
| 62. | Feng et al. 2019      | 10.1002/gj.3619                                                                                           | Combined method                        | Birmingham (UK)                                                                                   | 1,2,5,6,10,B                                                                                                                            | Analysis of canopy and surface UHI in different urbanization                             |

|     |                      |                                 |                                        |                                                                                                            |                                              |                                                                                                           |
|-----|----------------------|---------------------------------|----------------------------------------|------------------------------------------------------------------------------------------------------------|----------------------------------------------|-----------------------------------------------------------------------------------------------------------|
| 63. | Fenner et al. 2019   | 10.1088/1748-9326/ab506b        | Remote sensing imagery-based           | Berlin (Germany)                                                                                           | 2,4,5,6,8,9,A,B,C,D,F,G                      | Temperature analysis using CWS and LCZs spatial pattern during HWEs                                       |
| 64. | Fonte et al. 2019    | 10.1016/j.uclim.2019.100456     | Remote sensing imagery-based           | Hamburg (Hamburg)                                                                                          | 1,2,4,5,6,8,10,A,B,D,G                       | Enhance the WUDAPT L0 LCZs classification using OSM                                                       |
| 65. | Geiss et al. 2019    | 10.1109/JSTARS.2019.2917755     | Remote sensing imagery-based           | Cities in Germany; The Netherlands; UK                                                                     | Density/Height classes based on LCZs concept | Implementation of urban morphology classification based on Sentinel-2 and TanDEM-X data                   |
| 66. | Geletič et al. 2019a | 10.1016/j.buildenv.2019.04.011  | GIS-based                              | Prague; Brno (Czech Republic); Novi Sad (Serbia)                                                           | 1,2,3,4,5,6,8,9,10,A,B, C,D,E,F,G            | Inter-/intra-zonal seasonal variability of SUHI based on LCZs and implementation of land cover subclasses |
| 67. | Geletič et al. 2019b | 10.1007/s10584-018-2353-5       | GIS-based                              | Brno (Czech Republic)                                                                                      | 1,2,3,4,5,6,8,9,10,A,B, C,D,E,F,G            | Spatial modeling of summer temperatures using the MUKLIMO_3 model and based on LCZs                       |
| 68. | Hidalgo et al. 2019a | 10.1016/j.uclim.2018.10.004     | Remote sensing imagery-based/GIS-based | Paris; Toulouse; Nantes (France)                                                                           | All 17 LCZs                                  | Quality assessment of LCZs mapping comparing WUDAPT L0 and MapUCE approaches                              |
| 69. | Molnar et al. 2019   | 10.1007/s00704-019-02881-1      | Combined method                        | Szeged (Hungary)                                                                                           | 2,3,5,6,8,9,D,G                              | Modeling intra-urban temperature pattern in HW periods                                                    |
| 70. | Pour et al. 2019     | 10.1080/22797254.2018.1564888   | Expert knowledge-based                 | Olomouc (Czech Republic)                                                                                   | 2,4,5,6,8,A,G                                | Thermal data analysis in different LCZs                                                                   |
| 71. | Qui et al. 2019      | 10.1016/j.isprsjprs.2019.05.004 | Remote sensing imagery-based           | Amsterdam (The Netherlands); Paris (France); Munich; Cologne; Berlin (Germany); Milan (Italy); London (UK) | All 17 LCZs (except LCZ 7)                   | Contribution of automatic mapping using Sentinel-2 and Re-ResNet                                          |

|     |                       |                                 |                              |                                     |                                |                                                                                                             |
|-----|-----------------------|---------------------------------|------------------------------|-------------------------------------|--------------------------------|-------------------------------------------------------------------------------------------------------------|
| 72. | Rodler and Leduc 2019 | 10.1016/j.uclim.2019.100457     | GIS-based                    | Nantes (France)                     | All 17 LCZs                    | Development of GIS-based LCZs classification based on Delaunay triangulation and Skeletonization algorithms |
| 73. | Rostam and Beck 2019  | 10.5937/gp23-24238              | Remote sensing imagery-based | Globally, including European cities | All 17 LCZs                    | Spatial relationship of LST and LCZs                                                                        |
| 74. | Šećerov et al. 2019   | 10.1007/s10661-019-7210-0       | GIS-based                    | Novi Sad (Serbia)                   | 2,3,5,6,8,9,10,A,D,G           | Assessment of monitoring system of the UMN in Novi Sad                                                      |
| 75. | Straub et al. 2019    | 10.1016/j.uclim.2019.100491     | Combined method              | Augsburg (Germany)                  | 2,5,6,8,A,B,D                  | Modeling spatial pattern of UHI intensity based on UMN data                                                 |
| 76. | Verdonck et al. 2019  | 10.1016/j.jenvman.2019.06.111   | Remote sensing imagery-based | Brussels (Belgium)                  | 1,2,3,6,8,9,10,A,B,D,E,G       | Heat risk assessment based on urban planning and GHG emission                                               |
| 77. | Yoo et al. 2019       | 10.1016/j.isprsjprs.2019.09.009 | Remote sensing imagery-based | Rome (Italy); Madrid (Spain)        | 2,3,4,5,6,8,9,10,A,B,C,D,E,F,G | Using CNN and RF classifiers to improve the WUDAPT L0 approach                                              |
| 78. | Dian et al. 2020      | 10.1016/j.uclim.2019.100573     | Remote sensing imagery-based | Budapest (Hungary)                  | 2,5,6,8,A,D,G                  | Spatio-temporal analysis of SUHI in LCZs pattern                                                            |
| 79. | Droste et al. 2020    | 10.1002/qj.3811                 | Remote sensing imagery-based | Amsterdam (The Netherlands)         | All 17 LCZs                    | Assessment of crowdsourced wind data based on LCZs                                                          |
| 80. | Fricke et al. 2020    | 10.2478/mgr-2020-0004           | Remote sensing imagery-based | Szeged (Hungary); Novi Sad (Serbia) | 2,3,5,6,8,9,10,A,B,C,D,E,F,G   | Spatio-temporal differences of SUHI in LCZs pattern                                                         |
| 81. | Gardes et al. 2020    | 10.1016/j.scitotenv.2020.139253 | Combined method              | French cities                       | 1,2,3,4,5,6,7,8,9,D,E,G        | Investigation of the nocturnal UHI based on different urbanization patterns                                 |
| 82. | Leconte et al. 2020   | 10.1016/j.uclim.2020.100629     | Combined method              | Nancy (France)                      | 2,5,8,6/9,A,B,D,E,G            | Analysing the LCZs nocturnal cooling using mobile measurements                                              |
| 83. | Maharoor et al. 2020  | 10.1016/j.uclim.2020.100642     | Combined method              | Glasgow (UK, Scotland)              | 2                              | Investigating the microclimate in one densely built-up LCZ                                                  |

|     |                         |                             |                              |                                                                                           |                                |                                                                                                          |
|-----|-------------------------|-----------------------------|------------------------------|-------------------------------------------------------------------------------------------|--------------------------------|----------------------------------------------------------------------------------------------------------|
| 84. | Oliveira et al. 2020    | 10.1016/j.uclim.2020.100631 | GIS-based                    | Athens (Greece); Barcelona (Spain); Lisbon (Portugal); Marseille (France); Naples (Italy) | All 17 LCZs                    | Development of the Alternative GIS-based method and evaluation of spatial differences using LST datasets |
| 85. | Pour and Voženilek 2020 | 10.3354/GC2020-1-05         | Expert knowledge-based       | Olomouc (Czech Republic)                                                                  | 2,4,5,6,8,A,G                  | Thermal data analysis in different LCZs                                                                  |
| 86. | Rathmann et al. 2020    | 10.1016/j.ufug.2020.126622  | Remote sensing imagery-based | Augsburg (Germany)                                                                        | 2,5,6,8,A,B,D,F,G              | Exploring urban forest on bioclimatic conditions                                                         |
| 87. | Rosentreter et al. 2020 | 10.1016/j.rse.2019.111472   | Remote sensing imagery-based | German cities                                                                             | 1,2,4,5,6,8,9,10,A,B,C,D,E,F,G | Creation the workflow of LCZs mapping using Sentinel-2 and CNN                                           |
| 88. | Unger et al. 2020       | 10.1016/j.uclim.2020.100619 | GIS-based                    | Szeged (Hungary)                                                                          | 2,3,5,6,8,9,10,A,B,C,D,G       | Compare the thermal comfort conditions during HW and during a normal summer period                       |
| 89. | Venter et al. 2020      | 10.1016/j.rse.2020.111791   | Remote sensing imagery-based | Oslo (Norway)                                                                             | 2,3,4,5,6,8,9,A,B,D,E          | Temperature differences in LCZs from remote sensing and crowdsourced data                                |
| 90. | Vuckovic et al. 2020    | 10.1007/s12273-019-0564-y   | Remote sensing imagery-based | Vienna (Austria)                                                                          | 2,6,D <sub>E</sub>             | Air temperature modeling based on LCZs pattern                                                           |
| 91. | Zonato et al. 2020      | 10.1016/j.uclim.2020.100584 | Remote sensing imagery-based | Bologna (Italy)                                                                           | 2,5,6,8,A,B,D,E,G              | Implementing the novel WUDAPT approach to evaluate urban morphology                                      |
